# Supplementary material for: Tissue-Specific and Geographical Variation in Endophytic Fungi of Ageratina adenophora and Fungal Associations With the Environment
Source: PubMed Central journal article supplement (PMC6930192; doi:10.3389/fmicb.2019.02919), 2019-12-18
Supplement: Image_2.pdf [file Image_2.pdf]

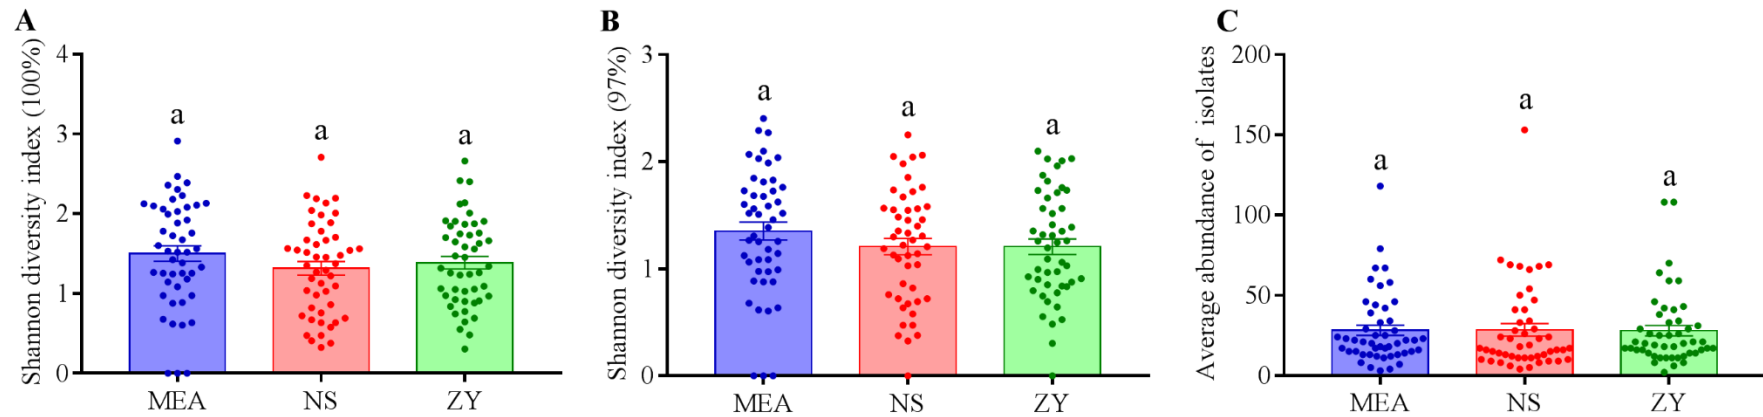

**Supplementary Figure S2.** Variation in Shannon diversity index (A (unique), B (97%)) and average abundance (C) for the cultivable fungal communities using different media. To satisfy normality and homoscedasticity assumptions, a log-transformation was applied to average abundance. Duncan was used for multiple comparisons. The same lowercase letters indicated no significant difference ( $p > 0.05$ ). Error bars depict the standard error.
