# Supplementary material for: Tissue-Specific and Geographical Variation in Endophytic Fungi of Ageratina adenophora and Fungal Associations With the Environment
Source: Front Microbiol. 2019 Dec 18;10:2919. doi: 10.3389/fmicb.2019.02919 (PMC6930192; doi:10.3389/fmicb.2019.02919)
Supplement: Supplementary file 6 [file Table_3.xlsx]

## Sheet: Supplementary Table 1
	Supplementary Table S3 Phylogenetic and abundance of isolated cultivable strains.
	Samples	Isolate sources	Abundance	Dominant genera	No. of OTUs (unique)	No. of OTUs (97%)
	Plant tissues	root	251	Fusarium (25.10%), Diaporthe (13.15%), Phialophora (13.15%)	68	36
		stem	340	Allophoma (23.82%), Diaporthe (22.06%), Colletotrichum (10.88%)	62	38
		leaf	1050	Colletotrichum (50.00%), Diaporthe (16.67%), Nemania (5.62%)	111	57
		withered leaf	233	Alternaria (21.46%), Allophoma (19.31%), Xylaria (18.45%), Didymella (18.03%)	34	21
	Air	canopy air	700	Cladosporium (22.86%), Trichoderma (14.29%), Epicoccum (9.86%)	91	56
		ambient air	555	Tremateia (12.25%), Epicoccum (11.35%), Pestalotiopsis (11.17%)	99	56
	Soil	rhizosphere soil	517	Trichoderma (27.27%), Mortierella (20.50%), Penicillium (9.09%)	63	39
		ambient soil	420	Penicillium (18.10%), Fusarium (17.86%), Purpureocillium (12.86%)	70	42
	Total		4066		458	201
